# Supplementary material for: Genetic control of the error-prone repair of a chromosomal double-strand break with 5’ overhangs in yeast
Source: PubMed Central journal article supplement — bioRxiv. 2023 May 4:2023.05.04.539391. Preprint. [Version 1] doi: 10.1101/2023.05.04.539391 (PMC10187297; doi:10.1101/2023.05.04.539391), 2023-05-04
Supplement: NIHPP2023.05.04.539391v1-supplement-1.pdf [file NIHPP2023.05.04.539391v1-supplement-1.pdf]

**Table S1. Frequencies of Lys<sup>+</sup> revertants and of survivors that lost the ZFN cleavage site**

| Spacer Sequence | Relevant Genotype         | Lys <sup>+</sup> revertants       |               | Survivors                         |               |
|-----------------|---------------------------|-----------------------------------|---------------|-----------------------------------|---------------|
|                 |                           | Frequency x 10 <sup>-4</sup> (CI) | # of cultures | Frequency x 10 <sup>-4</sup> (CI) | # of cultures |
| ACGAAT          | WT                        | 2.03<br>(1.78-2.28)               | 47            | 9.53<br>(7.89-11.2)               | 113           |
|                 | <i>ku70Δ</i>              | ND                                | 6             | 5.54<br>(3.98-7.18)               | 6             |
|                 | <i>dnl4Δ</i>              | ND                                | 4             | 4.28<br>(3.08-5.56)               | 8             |
|                 | <i>mre11Δ</i>             | ND                                | 12            | 1.65<br>(1.07-2.22)               | 12            |
|                 | <i>mre11-D56N</i>         | 16.3<br>(14.2-18.4)               | 12            | 11.3<br>(8.72-14.1)               | 9             |
|                 | <i>pol4Δ</i>              | 0.197<br>(0.167-0.226)            | 8             | 6.33<br>(4.28-8.45)               | 8             |
|                 | <i>pol4-D367E</i>         | 0.417<br>(0.374-0.460)            | 16            | 5.53<br>(3.87-7.31)               | 16            |
|                 | <i>pol4Δ mre11-D56N</i>   | 2.36<br>(2.12-2.59)               | 12            | 12.7<br>(10.0-15.2)               | 12            |
|                 | <i>pol4Δ rad1Δ</i>        | 0.339<br>(0.301-0.377)            | 8             | 9.98<br>(4.26-16.5)               | 12            |
|                 | <i>pol4Δ rev3Δ</i>        | 0.73<br>(0.519-0.942)             | 10            | 3.39<br>(2.09-4.74)               | 10            |
|                 | <i>pol4Δ rad30Δ</i>       | 0.397<br>(0.349-0.445)            | 11            |                                   |               |
|                 | <i>pol4Δ rev3Δ rad30Δ</i> | 0.174<br>(0.151-0.197)            | 10            | 6.89<br>(5.19-8.63)               | 10            |
|                 | <i>rev3Δ</i>              | 2.58<br>(2.07-3.09)               | 11            | 11.5<br>(7.39-15.6)               | 11            |
|                 | <i>rev3-D975A</i>         | 2.56<br>(2.17-2.95)               | 12            | 11.5<br>(7.71-15.2)               | 12            |
|                 | <i>rev7Δ</i>              | 1.33<br>(1.12-1.55)               | 8             | 26.2<br>(14.6-37.4)               | 8             |
|                 | <i>rad30Δ</i>             | 2.02<br>(1.41-2.64)               | 11            | 10.8<br>(7.72-13.8)               | 11            |
|                 | <i>rev3Δ rad30Δ</i>       | 1.02<br>(0.897-1.14)              | 10            | 8.15<br>(5.10-11.2)               | 10            |
|                 | <i>sgs1Δ exo1Δ</i>        | 1.93<br>(1.28-2.59)               | 10            | 0.579<br>(0.404-0.762)            | 14            |
|                 | <i>rad52Δ</i>             | 2.24<br>(1.77-2.71)               | 10            | 1.43<br>(1.06-1.80)               | 20            |
|                 | <i>tdp1Δ</i>              | 1.97<br>(1.53-2.40)               | 7             | 10.8<br>(8.22-13.5)               | 7             |
|                 | <i>rad1Δ</i>              | 2.32<br>(1.66-2.99)               | 14            | 15.2<br>(9.19-21.0)               | 10            |
|                 | <i>rad10Δ</i>             | 2.04<br>(1.65-2.42)               | 8             | 5.22<br>(4.00-6.35)               | 12            |
|                 | <i>mus81Δ</i>             | 3.68<br>(2.50-4.86)               | 9             | 6.61<br>(4.93-8.40)               | 8             |
|                 | <i>rad1Δ mus81Δ</i>       | 3.06<br>(1.97-4.15)               | 10            | 3.97<br>(3.05-4.83)               | 10            |
|                 | <i>slx4Δ</i>              | 2.40                              | 14            | 4.24                              | 14            |

|        |                         |                        |    |                     |    |
|--------|-------------------------|------------------------|----|---------------------|----|
|        |                         | (1.76-3.04)            |    | (2.90-5.53)         |    |
| ACGTAT | <i>WT</i>               | 3.63<br>(3.12-4.13)    | 15 |                     |    |
|        | <i>mre11-D56N</i>       | 49.6<br>(32.9-66.2)    | 12 |                     |    |
|        | <i>pol4Δ</i>            | 0.252<br>(0.200-0.304) | 12 |                     |    |
|        | <i>pol4Δ mre11-D56N</i> | 2.21<br>(1.88-2.54)    | 12 |                     |    |
|        | <i>pol4Δ mre11Δ</i>     | ND                     | 12 | 1.10<br>(0.70-1.49) | 12 |
|        | <i>pol4Δ pol3-D520V</i> | 0.145<br>(0.119-0.172) | 13 | 1.66<br>(0.98-2.60) | 13 |

ND – None detected

Gray shading indicates that the strain was not analyzed

**Table S2. Spectra in Lys+ revertants**

**SJR4848 (-1,ACGAAT) Lys+ revertants**

| Mutation | #   | T | A | C | A |   |   |   |   |   | C | G | A | A |   |   |   | T |   |   |   | G | G | C |   |
|----------|-----|---|---|---|---|---|---|---|---|---|---|---|---|---|---|---|---|---|---|---|---|---|---|---|---|
| +CGAA    | 69  | T | A | C | A |   |   |   |   |   | C | G | A | A | C | G | A | A | T |   |   |   | G | G | C |
| 2A>3A    | 59  | T | A | C | A |   |   |   |   |   | C | G | A | A | A |   |   | T |   |   |   |   | G | G | C |
| 1T>2T    | 61  | T | A | C | A |   |   |   |   |   | C | G | A | A |   |   | T | T |   |   |   |   | G | G | C |
| 1A>2A    | 14  | T | A | C | A | A |   |   |   |   | C | G | A | A |   |   | T |   |   |   |   |   | G | G | C |
| 1G>2G    | 5   | T | A | C | A |   |   |   |   |   | C | G | G | A | A |   | T |   |   |   |   |   | G | G | C |
| 1C>2C    | 4   | T | A | C | A |   |   |   |   | C | C | G | A | A |   |   | T |   |   |   |   |   | G | G | C |
| 2G>3G    | 1   | T | A | C | A |   |   |   |   |   | C | G | A | A |   |   | T |   |   |   |   | G | G | C |   |
| +CGAACCC | 1   | T | A | C | A | C | G | A | A | C | C | C | C | C | C | G | A | A |   |   |   |   | G | G | C |
| +CGAATGG | 1   | T | A | C | A | C | G | A | A | T | G | G | G | G | C | G | A | A |   |   |   |   | G | G | C |
| +GAAT    | 1   | T | A | C | A |   |   |   |   |   | C | G | A | A |   |   | T | G | A | A | T |   | G | G | C |
| -AC      | 1   | T | A | C | - |   |   |   |   |   | - | G | A | A |   |   | T |   |   |   |   |   | G | G | C |
| -GAATG   | 2   | T | A | C | A |   |   |   |   |   | C | - | - | - |   |   | - |   |   |   |   | - | G | C |   |
| -TGGCG   | 1   | T | A | C | A |   |   |   |   |   | C | G | A | A |   |   | - |   |   |   |   | - | - | - |   |
| -23 bp   | 1   | - | - | - | - |   |   |   |   |   | - | - | - | - |   |   | - |   |   |   |   | - | - | - |   |
| -29 bp   | 4   | - | - | - | - |   |   |   |   |   | - | - | - | - |   |   | - |   |   |   |   | - | - | - |   |
| -56 bp   | 1   | - | - | - | - |   |   |   |   |   | - | - | A | A |   |   | T |   |   |   |   | G | G | C |   |
| TOTAL    | 226 |   |   |   |   |   |   |   |   |   |   |   |   |   |   |   |   |   |   |   |   |   |   |   |   |

None  
GCC  
AAT

**SJR4883 (-1,ACGAAT) ku70Δ Lys+ revertants**

**SJR4880 (-1,ACGAAT) dni4Δ Lys+ revertants**

**SJR5247 (-1,ACGAAT) mre11Δ Lys+ revertants**

**SJR5223 (-1,ACGAAT) mre11-D56N Lys+ Revertants**

| Mutation    | #  | T | A | C | A |   |   |   |   |   | C | G | A | A |   |   |   | T | G | G | C |   |   |   |   |
|-------------|----|---|---|---|---|---|---|---|---|---|---|---|---|---|---|---|---|---|---|---|---|---|---|---|---|
| +CGAA       | 18 | T | A | C | A |   |   |   |   |   | C | G | A | A | C | G | A | A | T | G | G | C |   |   |   |
| 2A>3A       | 51 | T | A | C | A |   |   |   |   |   | C | G | A | A | A |   |   | T | G | G | C |   |   |   |   |
| 1T>2T       | 10 | T | A | C | A |   |   |   |   |   | C | G | A | A |   |   | T | T | G | G | C |   |   |   |   |
| 1A>2A       | 5  | T | A | C | A | A |   |   |   |   | C | G | A | A |   |   | T | G | G | C |   |   |   |   |   |
| 1G>2G       | 3  | T | A | C | A |   |   |   |   |   | C | G | G | A | A |   | T | G | G | C |   |   |   |   |   |
| 1C>2C       | 2  | T | A | C | A |   |   |   |   | C | C | G | A | A |   |   | T | G | G | C |   |   |   |   |   |
| +CGAATGG    | 1  | T | A | C | A | C | G | A | A | T | G | G | G | G | C | G | A | A |   |   |   | T | G | G | C |
| -AC         | 1  | T | A | C | - |   |   |   |   |   | - | G | A | A |   |   | T | G | G | C |   |   |   |   |   |
| -GAATG      | 1  | T | A | C | A |   |   |   |   |   | C | - | - | - |   |   | - | - | G | C |   |   |   |   |   |
| Complex Del | 1  | T | A | C | A |   |   |   |   |   | C | G | G | - | - |   | - | - | G | C |   |   |   |   |   |
| TOTAL       | 93 |   |   |   |   |   |   |   |   |   |   |   |   |   |   |   |   |   |   |   |   |   |   |   |   |

**SJR4876 (-1,ACGAAT) pol4Δ Lys+ Revertants**

| Mutation | #   | T | A | C | A |   | C | G | A | A | T | G | G | C |
|----------|-----|---|---|---|---|---|---|---|---|---|---|---|---|---|
| 2A>3A    | 121 | T | A | C | A | C | G | A | A | A | T | G | G | C |
| 1G>2G    | 3   | T | A | C | A | C | G | G | A | A | T | G | G | C |
| 2G>3G    | 1   | T | A | C | A | C | G | A | A | T | G | G | C |   |
| 1C>2C    | 1   | T | A | C | A | C | C | G | A | A | T | G | G | C |
| -TGGCG   | 1   | T | A | C | A | C | G | A | A | - | - | - | - |   |
| -20 bp   | 1   | - | - | - | - | - | - | A | A | T | G | G | C |   |
| -29 bp   | 1   | - | - | - | - | - | - | - | - | - | - | - |   |   |
| -29 bp   | 48  | - | - | - | - | - | - | - | - | - | - | - |   |   |
| -50 bp   | 6   | - | - | - | - | - | - | - | - | - | - | - |   |   |
| TOTAL    | 183 |   |   |   |   |   |   |   |   |   |   |   |   |   |

None  
None  
GCC  
CCAAG

**SJR5097 (-1,ACGAAT) pol4-D367E Lys+ Revertants**

| Mutation | #  | T | A | C | A | C | G | A | A |   |   |   | T | G | G | C |
|----------|----|---|---|---|---|---|---|---|---|---|---|---|---|---|---|---|
| +CGAA    | 3  | T | A | C | A | C | G | A | A | C | G | A | A | T | G | C |
| 2A>3A    | 66 | T | A | C | A | C | G | A | A | A |   |   | T | G | C |   |
| 1G>2G    | 1  | T | A | C | A | C | G | G | A | A |   |   | T | G | C |   |
| 2G>3G    | 2  | T | A | C | A | C | G | A | A |   |   |   | T | G | C |   |
| -TGGCG   | 1  | T | A | C | A | C | G | A | A | - | - | - | - |   |   |   |
| -14 bp   | 1  | T | A | C | - | - | - | - | - | - | - | - |   |   |   |   |
| -23 bp   | 1  | - | - | - | - | - | - | - | - | - | - |   |   |   |   |   |
| -29 bp   | 1  | - | - | - | - | - | - | - | - | - | - |   |   |   |   |   |
| -29 bp   | 1  | - | - | - | - | - | - | - | - | - | - |   |   |   |   |   |
| -29 bp   | 16 | - | - | - | - | - | - | - | - | - | - |   |   |   |   |   |
| -50 bp   | 2  | - | - | - | - | - | - | - | - | - | - |   |   |   |   |   |

ACG  
None  
None  
None  
GCC  
CCAAG

**SJR5169 (-1,ACGAAT) pol4Δ mre11-D56N Lys+ Revertants**

| Mutation | #  | T | A | C | A | C | G | A | A | T | G | G | C |   |
|----------|----|---|---|---|---|---|---|---|---|---|---|---|---|---|
| 2A>3A    | 91 | T | A | C | A | C | G | A | A | A | T | G | G | C |
| 1G>2G    | 3  | T | A | C | A | C | G | G | A | A | T | G | G | C |
| 2G>3G    | 1  | T | A | C | A | C | G | A | A | T | G | G | G | C |
| -29 bp   | 1  | - | - | - | - | - | - | - | - | - | - | - | - | - |
| TOTAL    | 96 |   |   |   |   |   |   |   |   |   |   |   |   |   |

GCC

**SJR5196 (-1,ACGAAT) pol4Δrad1Δ Lys+ Revertants**

| Mutation | #  | T | A | C | A | C | G | A | A | T | G | G | C |   |
|----------|----|---|---|---|---|---|---|---|---|---|---|---|---|---|
| 2A>3A    | 80 | T | A | C | A | C | G | A | A | A | T | G | G | C |
| 1G>2G    | 2  | T | A | C | A | C | G | G | A | A | T | G | G | C |
| 2G>3G    | 1  | T | A | C | A | C | G | A | A | T | G | G | G | C |
| +GAAT    | 1  | T | A | C | A | C | G | A | A | T | G | A | A | T |
| -AC      | 1  | T | A | C | - | - | G | A | A | T | - | - | - | - |
| -14 bp   | 1  | T | A | C | - | - | - | - | - | - | - | - | - | - |
| -29 bp   | 7  | - | - | - | - | - | - | - | - | - | - | - | - | - |
| -59 bp   | 1  | - | - | - | - | - | - | - | - | - | - | - | - | - |
| -86 bp   | 1  | - | - | - | - | - | - | - | - | - | - | - | - | - |
| TOTAL    | 95 |   |   |   |   |   |   |   |   |   |   |   |   |   |

ACG

GCC

None

None

**SJR52422 (-1,ACGAAT) pol4Δrev3Δ Lys+ Revertants**

| Mutation | #  | T | A | C | A | C | G | A | A | T | G | G | C |   |
|----------|----|---|---|---|---|---|---|---|---|---|---|---|---|---|
| 2A>3A    | 72 | T | A | C | A | C | G | A | A | A | T | G | G | C |
| 1G>2G    | 2  | T | A | C | A | C | G | G | A | A | T | G | G | C |
| -CGTGG   | 1  | T | A | C | A | C | G | A | A | T | G | G | - |   |
| -29 bp   | 9  | - | - | - | - | - | - | - | - | - | - | - | - |   |
| -50 bp   | 4  | - | - | - | - | - | - | - | - | - | - | - | - |   |
| -74 bp   | 1  | - | - | - | - | - | - | - | - | - | - | - | - |   |
| -86 bp   | 2  | - | - | - | - | - | - | - | - | - | - | - | - |   |
| -95 bp   | 3  | - | - | - | - | - | - | - | - | - | - | - | - |   |
| TOTAL    | 94 |   |   |   |   |   |   |   |   |   |   |   |   |   |

GCC

CCAAG

None

None

GACGAG

**SJR4882 (-1,ACGAAT) pol4Δrad30Δ Lys+ Revertants**

| Mutation | #  | T | A | C | A | C | G | A | A | T | G | G | C |
|----------|----|---|---|---|---|---|---|---|---|---|---|---|---|
| +CGAA    | 1  | T | A | C | A | C | G | A | A | C | G | A | A |
| 2A>3A    | 61 | T | A | C | A | - | - | C | G | A | A | A | T |
| 1G>2G    | 5  | T | A | C | A | - | - | C | G | G | A | A | T |
| -GA      | 1  | T | A | C | A | - | - | C | - | - | A | T | G |
| -29 bp   | 21 | - | - | - | - | - | - | - | - | - | - | - | - |
| -50 bp   | 5  | - | - | - | - | - | - | - | - | - | - | - | - |
| -56 bp   | 1  | - | - | - | - | - | - | - | - | A | A | T | G |
| TOTAL    | 95 |   |   |   |   |   |   |   |   |   |   |   |   |

GCC

CCAAG

AAT

**SJR4006 (-1,ACGAAT) pol4Δrev3Δrad30Δ Lys+ Revertants**

| Mutation | #  | T | A | C | A | C | G | A | A | T | G | G | C | G | T |
|----------|----|---|---|---|---|---|---|---|---|---|---|---|---|---|---|
| 2A>3A    | 87 | T | A | C | A | C | G | A | A | A | T | G | G | C | G |
| 1G>2G    | 2  | T | A | C | A | C | G | G | A | A | T | G | G | C | G |
| -TGGCG   | 1  | T | A | C | A | C | G | A | A | - | - | - | - | - | T |
| -GT      | 1  | T | A | C | A | C | G | A | A | T | G | G | C | - | - |
| -29 bp   | 1  | - | - | - | - | - | - | - | - | - | - | - | - | - | - |
| -29 bp   | 3  | - | - | - | - | - | - | - | - | - | - | - | - | - | - |
| -50 bp   | 1  | - | - | - | - | - | - | - | - | - | - | - | - | - | - |
| TOTAL    | 96 |   |   |   |   |   |   |   |   |   |   |   |   |   |   |

None

GCC

CCAAG

**SJR4884 (-1,ACGAAT) rev3Δ Lys+ Revertants**

| Mutation | #  | T | A | C | A | C | G | A | A | T | G | G | C |
|----------|----|---|---|---|---|---|---|---|---|---|---|---|---|
| +CGAA    | 58 | T | A | C | A | C | G | A | A | C | G | A | A |
| 2A>3A    | 14 | T | A | C | A | C | G | A | A | A | T | G | G |
| 1T>2T    | 12 | T | A | C | A | C | G | A | A | - | T | T | G |
| 1A>2A    | 3  | T | A | C | A | A | C | G | A | A | - | T | G |
| 1G>2G    | 2  | T | A | C | A | C | G | G | A | A | T | G | G |
| -29 bp   | 5  | - | - | - | - | - | - | - | - | - | - | - | - |
| TOTAL    | 94 |   |   |   |   |   |   |   |   |   |   |   |   |

GCC

**SJR5098 (-1,ACGAAT) rev3-D975A Lys+ Revertants**

| Mutation | # | T | A | C | A | C | G | A | A | T | G | G | C |
|----------|---|---|---|---|---|---|---|---|---|---|---|---|---|
|----------|---|---|---|---|---|---|---|---|---|---|---|---|---|

| Mutation | #  | T | A | C | A | C | G | A | A | T | G | G | C |
|----------|----|---|---|---|---|---|---|---|---|---|---|---|---|
| +CGAA    | 24 | T | A | C | A |   |   |   |   |   |   |   |   |
| 2A>3A    | 26 | T | A | C | A | C | G | A | A | A |   | T | G |
| 1T>2T    | 34 | T | A | C | A | C | G | A | A |   | T | T | G |
| 1A>2A    | 4  | T | A | C | A | A | C | G | A | A |   | T | G |
| 1G>2G    | 1  | T | A | C | A | C | G | G | A | A |   | T | G |
| +TTTT    | 1  | T | A | C | A | C | G | A | A | T | T | T | T |
| -CA      | 2  | T | A | - | - | C | G | A | A |   |   | T | G |
| -29 bp   | 3  | - | - | - | - | - | - | - | - | - | - | - | - |
| TOTAL    | 95 |   |   |   |   |   |   |   |   |   |   |   |   |

GCC

**SIR5193 (-1,ACGAAT) rev7Δ Lys+ Revertants**

| Mutation | #  | T | A | C | A | C | G | A | A | T | G | G | C |
|----------|----|---|---|---|---|---|---|---|---|---|---|---|---|
| +CGAA    | 18 | T | A | C | A |   |   |   |   |   |   |   |   |
| 2A>3A    | 29 | T | A | C | A | C | G | A | A | A |   | T | G |
| 1T>2T    | 33 | T | A | C | A | C | G | A | A |   | T | T | G |
| 1C>2C    | 4  | T | A | C | A | C |   |   |   |   |   | T | G |
| 1A>2A    | 6  | T | A | C | A | A | C | G | A | A |   | T | G |
| 2G>3G    | 2  | T | A | C | A | C | G | A | A |   | T | G | G |
| 1G>2G    | 2  | T | A | C | A | C | G | G | A | A |   | T | G |
| +CGAACCC | 1  | T | A | C | A | C | G | A | A | C | C | C | C |
| -AT      | 1  | T | A | C | A | C | G | A | - |   |   | - | G |
| TOTAL    | 96 |   |   |   |   |   |   |   |   |   |   |   |   |

**SIR4963 (-1,ACGAAT) rad30Δ Lys+ Revertants**

| Mutation     | #  | T | A | C | A | C | G | A | A | T | G | G | C |
|--------------|----|---|---|---|---|---|---|---|---|---|---|---|---|
| +CGAA        | 45 | T | A | C | A |   |   |   |   |   |   |   |   |
| 2A>3A        | 14 | T | A | C | A | C | G | A | A | A |   | T | G |
| 1T>2T        | 21 | T | A | C | A | C | G | A | A |   | T | T | G |
| 1A>2A        | 5  | T | A | C | A | A | C | G | A | A |   | T | G |
| 1G>2G        | 4  | T | A | C | A | C | G | G | A | A |   | T | G |
| 1C>2C        | 1  | T | A | C | A | C | C | G | A | A |   | T | G |
| +CGAAAAA     | 1  | T | A | C | A | C | G | A | A | A | A | A | A |
| Complex Del. | 1  | T | - | C | - |   |   |   |   |   |   | T | G |
| -29 bp       | 2  | - | - | - | - | - | - | - | - | - | - | - | - |
| TOTAL        | 94 |   |   |   |   |   |   |   |   |   |   |   |   |

GCC

**SIR4964 (-1,ACGAAT) rev3Δrad30Δ Lys+ Revertants**

| Mutation | #  | T | A | C | A | C | G | A | A | T | G | G | C |
|----------|----|---|---|---|---|---|---|---|---|---|---|---|---|
| +CGAA    | 12 | T | A | C | A | C | G | A | A | A |   | T | G |
| 2A>3A    | 33 | T | A | C | A | C | G | A | A | A |   | T | G |
| 1T>2T    | 38 | T | A | C | A | C | G | A | A |   | T | T | G |
| 1A>2A    | 9  | T | A | C | A | A | C | G | A | A |   | T | G |
| 1G>2G    | 1  | T | A | C | A | C | G | G | A | A |   | T | G |
| 2G>3G    | 1  | T | A | C | A | C | G | A | A |   | T | G | G |
| +TTTT    | 1  | T | A | C | A | C | G | A | A | T | T | T | T |
| -TGGCG   | 1  | T | A | C | A | C | G | A | A |   | - | - | - |
| TOTAL    | 96 |   |   |   |   |   |   |   |   |   |   |   |   |

**SIR5013 (-1,ACGAAT) sgs1Δexo1Δ Lys+ Revertants**

| Mutation | #  | T | A | C | A | C | G | A | A | T | G | G | C |
|----------|----|---|---|---|---|---|---|---|---|---|---|---|---|
| +CGAA    | 31 | T | A | C | A |   |   |   |   |   |   |   |   |
| 2A>3A    | 8  | T | A | C | A | C | G | A | A | A |   | T | G |
| 1T>2T    | 3  | T | A | C | A | C | G | A | A |   | T | T | G |
| 1A>2A    | 1  | T | A | C | A | A | C | G | A | A |   | T | G |
| 2G>3G    | 1  | T | A | C | A | C | G | A | A |   | T | G | G |
| +GAAT    | 1  | T | A | C | A | C | G | A | A |   | T | G | A |
| +CGAAGGG | 2  | T | A | C | A | C | G | A | A | G | G | G | G |
| +CGAAAAA | 2  | T | A | C | A | C | G | A | A | A | A | A | A |
| -29 bp   | 36 | - | - | - | - | - | - | - | - | - | - | - | - |
| -29 bp   | 1  | - | - | - | - | - | - | - | - | - | - | - | - |
| -29 bp   | 1  | - | - | - | - | - | - | - | - | - | - | - | - |
| -29 bp   | 1  | - | - | - | - | - | - | - | - | - | - | - | - |
| -50 bp   | 2  | - | - | - | - | - | - | - | - | - | - | - | - |
| -71 bp   | 1  | - | - | - | - | - | - | - | - | - | - | - | - |
| -71 bp   | 1  | - | - | - | - | - | - | - | - | - | - | - | - |
| -95 bp   | 1  | - | - | - | - | - | - | - | - | - | - | - | - |
| -119 bp  | 1  | - | - | - | - | - | - | - | - | - | - | - | - |
| TOTAL    | 94 |   |   |   |   |   |   |   |   |   |   |   |   |

GCC  
None  
None  
None  
None  
CCAAG  
None  
None  
GACGAG  
GAC



**SJR5201 (-1,ACGAAT) mus81Δ Lys+ Revertants**

| Mutation     | #         | T | A | C | A | C | G | A | A | T | G | G | C |
|--------------|-----------|---|---|---|---|---|---|---|---|---|---|---|---|
| +CGAA        | 28        | T | A | C | A | C | G | A | A | C | G | A | A |
| 2A>3A        | 10        | T | A | C | A | C | G | A | A | A | T | G | G |
| 1T>2T        | 39        | T | A | C | A | C | G | A | A | T | T | G | G |
| 1A>2A        | 7         | T | A | C | A | A | C | G | A | A | T | G | G |
| 2G>3G        | 1         | T | A | C | A | C | G | A | A | T | G | G | G |
| 1G>2G        | 1         | T | A | C | A | C | G | G | A | A | T | G | G |
| 1C>2C        | 1         | T | A | C | A | C | G | A | A | T | G | G | C |
| +CAAA        | 1         | T | A | C | A | C | G | A | A | C | A | A | A |
| -CA          | 2         | T | A | - | - | C | G | A | A | T | G | G | C |
| Complex Del  | 1         | T | A | C | A | C | G | A | A | C | - | - | C |
| <b>TOTAL</b> | <b>91</b> |   |   |   |   |   |   |   |   |   |   |   |   |

**SJR5202 (-1,ACGAAT) mus81Δrad1Δ Lys+ Revertants**

| Mutation     | #         | T | A | C | A | C | G | A | A | T | G | G | C |
|--------------|-----------|---|---|---|---|---|---|---|---|---|---|---|---|
| +CGAA        | 39        | T | A | C | A | C | G | A | A | C | G | A | A |
| 2A>3A        | 13        | T | A | C | A | C | G | A | A | A | T | G | G |
| 1T>2T        | 31        | T | A | C | A | C | G | A | A | T | T | G | G |
| 1A>2A        | 3         | T | A | C | A | A | C | G | A | A | T | G | G |
| 2G>3G        | 1         | T | A | C | A | C | G | A | A | T | G | G | G |
| 1G>2G        | 2         | T | A | C | A | C | G | G | A | A | T | G | G |
| 1C>2C        | 1         | T | A | C | A | C | G | A | A | T | G | G | C |
| -GC          | 1         | T | A | C | A | C | G | A | A | T | G | - | - |
| -CA          | 1         | T | A | - | - | C | G | A | A | T | G | G | C |
| -29 bp       | 1         | - | - | - | - | - | - | - | - | - | - | - | - |
| -50 bp       | 1         | - | - | - | - | - | - | - | - | - | - | - | - |
| <b>TOTAL</b> | <b>94</b> |   |   |   |   |   |   |   |   |   |   |   |   |

GCC  
CCAAG

**SJR5240 (-1,ACGAAT) slx4Δ Lys+ Revertants**

| Mutation         | #          | T | A | C | A | C | G | A | A | T | G | G | C |
|------------------|------------|---|---|---|---|---|---|---|---|---|---|---|---|
| +CGAA            | 37         | T | A | C | A | C | G | A | A | C | G | A | A |
| 2A>3A            | 32         | T | A | C | A | C | G | A | A | A | T | G | G |
| 1T>2T            | 18         | T | A | C | A | C | G | A | A | T | T | G | G |
| 1A>2A            | 3          | T | A | C | A | A | C | G | A | A | T | G | G |
| 1G>2G            | 2          | T | A | C | A | C | G | G | A | A | T | G | G |
| 1C>2C            | 1          | T | A | C | A | C | G | A | A | T | G | G | C |
| +TTTT            | 1          | T | A | C | A | C | G | A | A | T | T | T | T |
| -GA              | 1          | T | A | C | A | C | - | - | A | T | G | G | C |
| -29 bp           | 7          | - | - | - | - | - | - | - | - | - | - | - | - |
| -35 bp           | 1          | - | - | - | - | - | - | - | - | - | - | - | - |
| -50 bp           | 1          | - | - | - | - | - | - | - | - | - | - | - | - |
| -53 bp (Complex) | 1          | - | - | - | - | - | - | - | - | - | - | - | - |
| -74 bp           | 1          | - | - | - | - | - | - | - | - | - | - | - | - |
| -95 bp           | 2          | - | - | - | - | - | - | - | - | - | - | - | - |
| <b>TOTAL</b>     | <b>108</b> |   |   |   |   |   |   |   |   |   |   |   |   |

GCC  
GTT  
CCAAG  
None  
None  
GACGAG

**SJR5224 (-1,ACGTAT) Lys+ Revertants**

| Mutation     | #          | T | A | C | A | C | G | T | A | T | G | G | C |
|--------------|------------|---|---|---|---|---|---|---|---|---|---|---|---|
| +CGTA        | 43         | T | A | C | A | C | G | T | A | C | G | T | A |
| +CGTC        | 1          | T | A | C | A | C | G | T | C | C | G | T | A |
| +CGTAAAA     | 1          | T | A | C | A | C | G | T | A | A | A | A | A |
| 1C>2C        | 3          | T | A | C | A | C | G | T | A | T | G | G | C |
| 1T>2T        | 63         | T | A | C | A | C | G | T | A | T | T | G | G |
| -AT          | 1          | T | A | C | A | C | G | T | - | - | G | G | C |
| -TG          | 1          | T | A | C | A | C | G | T | A | - | - | G | C |
| -AC          | 1          | T | A | C | - | - | G | T | A | T | G | G | C |
| -29 bp       | 2          | - | - | - | - | - | - | - | - | - | - | - | - |
| <b>TOTAL</b> | <b>116</b> |   |   |   |   |   |   |   |   |   |   |   |   |

GCC

**SJR5227 (-1,ACGTAT) mre11-D56N Lys+ Revertants**

| Mutation    | #  | T | A | C | A | C | G | T | A | T | G | G | C |
|-------------|----|---|---|---|---|---|---|---|---|---|---|---|---|
| +CGTA       | 73 | T | A | C | A | C | G | T | A | C | G | T | A |
| 1C>2C       | 1  | T | A | C | A | C | G | T | A | T | G | G | C |
| 1T>2T       | 14 | T | A | C | A | C | G | T | A | T | T | G | G |
| Complex Del | 1  | T | A | C | A | C | G | T | A | T | A | - | - |
| -AT         | 4  | T | A | C | A | C | G | T | - | - | G | G | C |
| -CG         | 1  | T | A | C | A | - | - | T | A | T | G | G | C |
| -TG         | 1  | T | A | C | A | C | G | T | A | - | - | G | C |





**Table S3. Spectra in survivors**

**SJR4848 (-1,ACGAAT) Survivors**

| Mutation          | #   | T | A | C | A | C | G | A | A | T | G | G | C |
|-------------------|-----|---|---|---|---|---|---|---|---|---|---|---|---|
| +AC               | 26  | T | A | C | A | C | G | A | A | T | G | G | C |
| +CGAAC            | 1   | T | A | C | A | C | G | A | A | C | G | A | A |
| +CGA              | 1   | T | A | C | A | C | G | A | A | T | G | G | C |
| +AA               | 1   | T | A | C | A | A | A | A | A | T | G | G | C |
| +AA               | 1   | T | A | C | A | A | A | A | A | T | G | G | C |
| +AAAA             | 1   | T | A | C | A | A | A | A | A | T | G | G | C |
| -A                | 1   | T | A | C | - | - | - | - | - | T | G | G | C |
| -A                | 1   | T | A | C | A | - | - | - | - | T | G | G | C |
| -37 bp            | 1   | T | A | C | A | - | - | - | - | - | - | - | - |
| -19 bp            | 1   | - | - | - | - | - | - | - | - | T | G | G | C |
| -15 bp            | 1   | - | - | - | - | - | - | - | - | - | G | C |   |
| -1175 bp          | 36  | T | A | C | A | - | - | - | - | - | - | - | - |
| -11,731 bp        | 11  | - | - | - | - | - | - | - | - | - | - | - | - |
| Maintain Cut Site | 72  | T | A | C | A | - | - | - | - | T | G | G | C |
| TOTAL sequenced   | 155 |   |   |   |   |   |   |   |   |   |   |   |   |

None  
None  
None  
CCAAGCTACTACA  
TGGAAAAAAAAAAAA

**SJR4883 (-1,ACGAAT) ku70Δ Survivors**

| Mutation          | #  | T | A | C | A | C | G | A | A | T | G | G | C |
|-------------------|----|---|---|---|---|---|---|---|---|---|---|---|---|
| -1175 bp          | 35 | T | A | C | A | - | - | - | - | - | - | - | - |
| -11,731 bp        | 3  | - | - | - | - | - | - | - | - | - | - | - | - |
| Maintain Cut Site | 56 | T | A | C | A | C | G | A | A | T | G | G | C |
| TOTAL sequenced   | 94 |   |   |   |   |   |   |   |   |   |   |   |   |

CCAAGCTACTACA  
TGGAAAAAAAAAAAA

**SJR4880 (-1,ACGAAT) dnl4Δ Survivors**

| Mutation          | #  | T | A | C | A | C | G | A | A | T | G | G | C |
|-------------------|----|---|---|---|---|---|---|---|---|---|---|---|---|
| -1175 bp          | 24 | T | A | C | A | - | - | - | - | - | - | - | - |
| -11,731 bp        | 14 | - | - | - | - | - | - | - | - | - | - | - | - |
| Maintain Cut Site | 58 | T | A | C | A | C | G | A | A | T | G | G | C |
| TOTAL sequenced   | 96 |   |   |   |   |   |   |   |   |   |   |   |   |

CCAAGCTACTACA  
TGGAAAAAAAAAAAA

**SJR5247 (-1,ACGAAT) mre11Δ Survivors**

| Mutation          | #  | T | A | C | A | C | G | A | A | T | G | G | C |
|-------------------|----|---|---|---|---|---|---|---|---|---|---|---|---|
| -1175 bp          | 46 | T | A | C | A | - | - | - | - | - | - | - | - |
| -11,731 bp        | 1  | - | - | - | - | - | - | - | - | - | - | - | - |
| Maintain Cut Site | 47 | T | A | C | A | C | G | A | A | T | G | G | C |
| TOTAL sequenced   | 94 |   |   |   |   |   |   |   |   |   |   |   |   |

CCAAGCTACTACA  
TGGAAAAAAAAAAAA

**SJR5223 (-1,ACGAAT) mre11-D56N Survivors**

| Mutation          | #  | T | A | C | A | C | G | A | A | T | G | G | C |
|-------------------|----|---|---|---|---|---|---|---|---|---|---|---|---|
| +AC               | 7  | T | A | C | A | C | G | A | A | T | G | G | C |
| +CGAA             | 1  | T | A | C | A | C | G | A | A | C | G | A | A |
| 2A>3A             | 8  | T | A | C | A | C | G | A | A | A | T | G | C |
| +AA               | 2  | T | A | C | A | C | G | A | A | A | A | T | C |
| -A                | 1  | T | A | C | A | C | G | A | - | - | T | G | C |
| -1175 bp          | 29 | T | A | C | A | - | - | - | - | - | - | - | - |
| -11,731 bp        | 5  | - | - | - | - | - | - | - | - | - | - | - | - |
| Maintain Cut Site | 34 | T | A | C | A | C | G | A | A | T | G | G | C |
| TOTAL sequenced   | 87 |   |   |   |   |   |   |   |   |   |   |   |   |

CCAAGCTACTACA  
TGGAAAAAAAAAAAA

**SJR4876 (-1,ACGAAT) pol4Δ Survivors**

| Mutation          | #  | T | A | C | A | C | G | A | A | T | G | G | C |
|-------------------|----|---|---|---|---|---|---|---|---|---|---|---|---|
| 2A>3A             | 2  | T | A | C | A | C | G | A | A | A | T | G | C |
| -1175 bp          | 29 | T | A | C | A | - | - | - | - | - | - | - | - |
| -11,731 bp        | 8  | - | - | - | - | - | - | - | - | - | - | - | - |
| Maintain Cut Site | 54 | T | A | C | A | C | G | A | A | T | G | G | C |
| TOTAL sequenced   | 93 |   |   |   |   |   |   |   |   |   |   |   |   |

CCAAGCTACTACA  
TGGAAAAAAAAAAAA

**SJR5097 (-1,ACGAAT) pol4-D367E Survivors**

| Mutation          | #  | T | A | C | A | C | G | A | A | T | G | G | C |
|-------------------|----|---|---|---|---|---|---|---|---|---|---|---|---|
| -1175 bp          | 32 | T | A | C | A | - | - | - | - | - | - | - | - |
| -11,731 bp        | 2  | - | - | - | - | - | - | - | - | - | - | - | - |
| Maintain Cut Site | 62 | T | A | C | A | C | G | A | A | T | G | G | C |
| TOTAL sequenced   | 96 |   |   |   |   |   |   |   |   |   |   |   |   |

CCAAGCTACTACA  
TGGAAAAAAAAAAAA

**SJR5169 (-1,ACGAAT) pol4Δ mre11-D56N Survivors**

| Mutation          | #  | T | A | C | A | C | G | A | A | T | G | G | C |
|-------------------|----|---|---|---|---|---|---|---|---|---|---|---|---|
| +CACGAA           | 1  | T | A | C | A | C | A | C | G | A | A | C | G |
| 2A>3A             | 10 | T | A | C | A | - | - | - | - | C | G | A | A |
| +GA               | 1  | T | A | C | A | - | - | - | - | C | G | A | A |
| -55 bp            | 1  | T | A | C | - | - | - | - | - | - | - | - | - |
| -1175 bp          | 42 | T | A | C | A | - | - | - | - | - | - | - | - |
| -11,731 bp        | 8  | - | - | - | - | - | - | - | - | - | - | - | - |
| Maintain Cut Site | 33 | T | A | C | A | - | - | - | - | C | G | A | A |
| TOTAL sequenced   | 96 |   |   |   |   |   |   |   |   |   |   |   |   |

ACGA  
CCAAGCTACTACA  
TGGAAAAAAAAAAAA

**SJR5196 (-1,ACGAAT) pol4Δrad1Δ Survivors**

| Mutation | # | T | A | C | A | C | G | A | A | T | G | G | C |
|----------|---|---|---|---|---|---|---|---|---|---|---|---|---|
| -55 bp   | 2 | T | A | C | - | - | - | - | - | - | - | - | - |
| -231 bp  | 1 | T | A | C | - | - | - | - | - | - | - | - | - |

ACGA  
None

|                   |    |                         |
|-------------------|----|-------------------------|
| -1175 bp          | 38 | T A C A C G A A T G G C |
| -11,731 bp        | 32 | T A C A C G A A T G G C |
| Maintain Cut Site | 17 | T A C A C G A A T G G C |
| TOTAL sequenced   | 90 |                         |

**SJR5242 (-1,ACGAAT) pol4Δrev3Δ Survivors**

|                   |    |                           |                                                         |
|-------------------|----|---------------------------|---------------------------------------------------------|
| Mutation          | #  | T A C A C G A A T G G C   | ACGA<br>GAA<br>None<br>CCAAGCTACTACA<br>TGGAAAAAAAAAAAA |
| 2A>3A             | 2  | T A C A C G A A A T G G C |                                                         |
| -55 bp            | 1  | T A C - - - - -           |                                                         |
| -154 bp           | 1  | T A C A C - - - - -       |                                                         |
| -231 bp           | 1  | T A C - - - - -           |                                                         |
| -1175 bp          | 20 | T A C A - - - - -         |                                                         |
| -11,731 bp        | 10 | - - - - -                 |                                                         |
| Maintain Cut Site | 55 | T A C A C G A A T G G C   |                                                         |
| TOTAL sequenced   | 90 |                           |                                                         |

**SJR4882 (-1,ACGAAT) pol4Δrad30Δ Survivors**

**SJR4006 (-1,ACGAAT) pol4Δrev3Δrad30Δ Survivors**

|                   |    |                           |                                  |
|-------------------|----|---------------------------|----------------------------------|
| Mutation          | #  | T A C A C G A A T G G C   | CCAAGCTACTACA<br>TGGAAAAAAAAAAAA |
| 2A>3A             | 2  | T A C A C G A A A T G G C |                                  |
| -A                | 2  | T A C A C G A - T G G C   |                                  |
| -1175 bp          | 29 | T A C A - - - - -         |                                  |
| -11,731 bp        | 10 | - - - - -                 |                                  |
| Maintain Cut Site | 50 | T A C A C G A A T G G C   |                                  |
| TOTAL sequenced   | 93 |                           |                                  |

**SJR4884 (-1,ACGAAT) rev3Δ Survivors**

|                   |    |                                     |                                  |
|-------------------|----|-------------------------------------|----------------------------------|
| Mutation          | #  | T A C A C G A A T G G C             | CCAAGCTACTACA<br>TGGAAAAAAAAAAAA |
| +AC               | 14 | T A C A C A C G A A T G G C         |                                  |
| +CGAA             | 1  | T A C A C A C G A A C G A A T G G C |                                  |
| 2A>3A             | 1  | T A C A C A C G A A A T G G C       |                                  |
| +AA               | 1  | T A C A A A C G A A T G G C         |                                  |
| -A                | 1  | T A C A C G A - T G G C             |                                  |
| -1175 bp          | 22 | T A C A - - - - -                   |                                  |
| -11,731 bp        | 12 | - - - - -                           |                                  |
| Maintain Cut Site | 39 | T A C A C G A A T G G C             |                                  |
| TOTAL sequenced   | 91 |                                     |                                  |

**SJR5098 (-1,ACGAAT) rev3-D975A Survivors**

|                   |    |                                   |                                  |
|-------------------|----|-----------------------------------|----------------------------------|
| Mutation          | #  | T A C A C G A A T G G C           | CCAAGCTACTACA<br>TGGAAAAAAAAAAAA |
| +AC               | 13 | T A C A C A C G A A T G G C       |                                  |
| 2A>3A             | 5  | T A C A C A C G A A A T G G C     |                                  |
| +GAA              | 1  | T A C A C A C G A A G A A T G G C |                                  |
| +TT               | 1  | T A C A C A C G A A T T T G G C   |                                  |
| -1175 bp          | 20 | T A C A - - - - -                 |                                  |
| -11,731 bp        | 6  | - - - - -                         |                                  |
| Maintain Cut Site | 46 | T A C A C G A A T G G C           |                                  |
| TOTAL sequenced   | 92 |                                   |                                  |

**SJR5193 (-1,ACGAAT) rev7Δ Survivors**

|                   |    |                                                 |                                  |
|-------------------|----|-------------------------------------------------|----------------------------------|
| Mutation          | #  | T A C T A C A C G A A T G G C                   | CCAAGCTACTACA<br>TGGAAAAAAAAAAAA |
| +AC               | 6  | T A C T A C A C A C G A A T G G C               |                                  |
| +CGAAAA           | 1  | T A C T A C A C A C G A A A A A C G A A T G G C |                                  |
| +CGAAAA           | 1  | T A C T A C A C A C G A A A A A C G A A T G G C |                                  |
| +CGAAT            | 1  | T A C T A C A C A C G A A T C G A A T G G C     |                                  |
| +CGAAA            | 1  | T A C T A C A C A C G A A A C G A A T G G C     |                                  |
| +CGAA             | 1  | T A C T A C A C A C G A A C G A A T G G C       |                                  |
| +CGA              | 2  | T A C T A C A C A C G A C G A A T G G C         |                                  |
| +CGG              | 1  | T A C T A C A C A C G G C G A A T G G C         |                                  |
| +TT               | 1  | T A C T A C A C A C G A A T T T G G C           |                                  |
| +GAA              | 1  | T A C T A C A C A C G A A G A A T G G C         |                                  |
| +AAA              | 1  | T A C T A C A C A C G A A A A A T G G C         |                                  |
| +AAAA             | 1  | T A C T A C A C A C G A A A A A A T G G C       |                                  |
| +CCCGAA           | 1  | T A C T A C A C A C G A A C C C G A A T G G C   |                                  |
| 2A>3A             | 3  | T A C T A C A C A C G A A A T G G C             |                                  |
| 1C>2C             | 1  | T A C T A C A C A C G A A T G G C               |                                  |
| 1G>2G             | 1  | T A C T A C A C A C G G A A T G G C             |                                  |
| 1T>2T             | 1  | T A C T A C A C A C G A A T T G G C             |                                  |
| -CG               | 1  | T A C T A C A C A - - A A T G G C               |                                  |
| -AGCT             | 1  | - A C T A C A C A C G A A T G G C               |                                  |
| -1175 bp          | 25 | T A C T A C A C A - - - - -                     |                                  |
| -11,731 bp        | 18 | - - - - -                                       |                                  |
| Maintain Cut Site | 21 | T A C T A C A C A C G A A T G G C               |                                  |
| TOTAL sequenced   | 91 |                                                 |                                  |

**SJR4963 (-1,ACGAAT) rad30Δ Survivors**

|            |    |                                       |                                          |
|------------|----|---------------------------------------|------------------------------------------|
| Mutation   | #  | T A C A C G A A T G G C               | None<br>CCAAGCTACTACA<br>TGGAAAAAAAAAAAA |
| +AC        | 14 | T A C A C A C G A A T G G C           |                                          |
| +CGAAA     | 1  | T A C A C A C G A A A C G A A T G G C |                                          |
| -A         | 1  | T A C A C G A - T G G C               |                                          |
| -231 bp    | 1  | T A C A - - - - -                     |                                          |
| -1175 bp   | 25 | T A C A - - - - -                     |                                          |
| -11,731 bp | 11 | - - - - -                             |                                          |

|                   |    |
|-------------------|----|
| Maintain Cut Site | 38 |
| TOTAL sequenced   | 91 |

**SJR4964 (-1,ACGAAT) rev3Δrad30Δ Survivors**

| Mutation          | #  | T | A | C | A | C | G | A | A | T | G | G | C |
|-------------------|----|---|---|---|---|---|---|---|---|---|---|---|---|
| +AC               | 12 | T | A | C | A | C | G | A | A | T | G | G | C |
| 2A>3A             | 1  | T | A | C | A | C | G | A | A | A | T | G | C |
| -A                | 1  | T | A | C | A | C | G | A | - | T | G | G | C |
| -751 bp           | 1  | T | A | C | A | - | - | - | - | - | - | - | - |
| -1175 bp          | 22 | T | A | C | A | - | - | - | - | - | - | - | - |
| -11,731 bp        | 11 | - | - | - | - | - | - | - | - | - | - | - | - |
| Maintain Cut Site | 48 | T | A | C | A | C | G | A | A | T | G | G | C |
| TOTAL sequenced   | 96 |   |   |   |   |   |   |   |   |   |   |   |   |

None  
CCAAGCTACTACA  
TGGAAAAAAAAAAAA

**SJR5013 (-1,ACGAAT) sgs1Δexo1Δ Survivors**

| Mutation          | #  | A | G | C | T | A | C | T | A | C | A | A | C | G | A | A | T | G | G | C |   |   |   |   |   |   |
|-------------------|----|---|---|---|---|---|---|---|---|---|---|---|---|---|---|---|---|---|---|---|---|---|---|---|---|---|
| +AC               | 24 | A | G | C | T | A | C | T | A | C | A | A | C | G | A | A | T | G | G | C |   |   |   |   |   |   |
| +CGAACCC          | 1  | A | G | C | T | A | C | T | A | C | A | C | G | A | A | C | C | C | C | G | A | A | T | G | G | C |
| +CGAA             | 5  | A | G | C | T | A | C | T | A | C | A | C | G | A | A | C | G | A | A | T | G | G | C |   |   |   |
| +CGA              | 1  | A | G | C | T | A | C | T | A | C | A | C | G | A | A | C | G | A | A | T | G | G | C |   |   |   |
| +CG               | 1  | A | G | C | T | A | C | T | A | C | A | C | G | A | A | C | G | A | A | T | G | G | C |   |   |   |
| +GAA              | 1  | A | G | C | T | A | C | T | A | C | A | A | C | G | A | A | G | A | A | T | G | G | C |   |   |   |
| -29 bp            | 1  | - | - | - | - | - | - | - | - | - | - | - | - | - | - | - | - | - | - | - | - | - | - | - |   |   |
| -75 bp            | 1  | - | - | - | - | - | - | - | - | - | - | - | - | - | - | - | - | - | - | - | - | - | - | - |   |   |
| -231 bp           | 1  | A | G | C | T | A | C | T | A | C | A | A | C | G | A | A | T | G | G | C |   |   |   |   |   |   |
| -1175 bp          | 2  | A | G | C | T | A | C | T | A | C | A | A | C | G | A | A | T | G | G | C |   |   |   |   |   |   |
| -1384 bp          | 1  | A | - | - | - | - | - | - | - | - | - | - | - | - | - | - | - | - | - | - | - | - | - | - |   |   |
| Maintain Cut Site | 52 | A | G | C | T | A | C | T | A | C | A | A | C | G | A | A | T | G | G | C |   |   |   |   |   |   |
| TOTAL sequenced   | 91 |   |   |   |   |   |   |   |   |   |   |   |   |   |   |   |   |   |   |   |   |   |   |   |   |   |

GCC  
AGTT  
None  
CCAAGCTACTACA  
None

**SJR5194 (-1,ACGAAT) rad52Δ Survivors**

| Mutation          | #   | T | A | C | A | C | G | A | A | T | G | G | C |
|-------------------|-----|---|---|---|---|---|---|---|---|---|---|---|---|
| +AC               | 36  | T | A | C | A | C | G | A | A | T | G | G | C |
| 2A>3A             | 2   | T | A | C | A | C | G | A | A | A | T | G | C |
| +AA               | 1   | T | A | C | A | C | G | A | A | A | T | G | C |
| -1175 bp          | 18  | T | A | C | A | - | - | - | - | - | - | - | - |
| -11,731 bp        | 1   | - | - | - | - | - | - | - | - | - | - | - | - |
| Maintain Cut Site | 65  | T | A | C | A | C | G | A | A | T | G | G | C |
| TOTAL sequenced   | 123 |   |   |   |   |   |   |   |   |   |   |   |   |

CCAAGCTACTACA  
TGGAAAAAAAAAAAA

**SJR4885 (-1,ACGAAT) tdp1Δ Survivors**

| Mutation          | #   | T | A | C | A | C | G | A | A | T | G | G | C |
|-------------------|-----|---|---|---|---|---|---|---|---|---|---|---|---|
| +AC               | 12  | T | A | C | A | C | G | A | A | T | G | G | C |
| 2A>3A             | 2   | T | A | C | A | C | G | A | A | A | T | G | C |
| -A                | 1   | T | A | C | A | C | G | A | - | T | G | G | C |
| -56 bp            | 1   | - | - | - | - | - | - | - | A | A | T | G | C |
| -75 bp            | 1   | T | A | C | A | - | - | - | - | - | - | - | - |
| -1175 bp          | 28  | T | A | C | A | - | - | - | - | - | - | - | - |
| -11,731 bp        | 14  | - | - | - | - | - | - | - | - | - | - | - | - |
| Maintain Cut Site | 51  | T | A | C | A | C | G | A | A | T | G | G | C |
| TOTAL sequenced   | 110 |   |   |   |   |   |   |   |   |   |   |   |   |

ATT  
None  
CCAAGCTACTACA  
TGGAAAAAAAAAAAA

**SJR5199 (-1,ACGAAT) rad1Δ Survivors**

| Mutation          | #  | T | A | C | A | C | G | A | A | T | G | G | C |
|-------------------|----|---|---|---|---|---|---|---|---|---|---|---|---|
| +AC               | 33 | T | A | C | A | C | G | A | A | T | G | G | C |
| 1A>2A             | 1  | T | A | C | A | C | G | A | A | T | G | G | C |
| 2A>3A             | 3  | T | A | C | A | C | G | A | A | A | T | G | C |
| 1T>2T             | 1  | T | A | C | A | C | G | A | A | T | T | G | C |
| 1G>2G             | 1  | T | A | C | A | C | G | G | A | A | T | G | C |
| -A                | 4  | T | A | C | A | C | G | A | - | T | G | G | C |
| -1175 bp          | 28 | T | A | C | A | - | - | - | - | - | - | - | - |
| -11,731 bp        | 9  | - | - | - | - | - | - | - | - | - | - | - | - |
| Maintain Cut Site | 5  | T | A | C | A | C | G | A | A | T | G | G | C |
| TOTAL sequenced   | 85 |   |   |   |   |   |   |   |   |   |   |   |   |

CCAAGCTACTACA  
TGGAAAAAAAAAAAA

**SJR5200 (-1,ACGAAT) rad10Δ Survivors combined**

| Mutation          | #   | T | A | C | A | C | G | A | A | T | G | G | C |
|-------------------|-----|---|---|---|---|---|---|---|---|---|---|---|---|
| +AC               | 58  | T | A | C | A | C | G | A | A | T | G | G | C |
| +AA               | 1   | T | A | C | A | A | A | C | G | A | A | T | G |
| 1G>2G             | 1   | T | A | C | A | C | G | G | A | A | T | G | C |
| 1T>2T             | 1   | T | A | C | A | C | G | A | A | T | T | G | C |
| 2A>3A             | 5   | T | A | C | A | C | G | A | A | A | T | G | C |
| +CGAAC            | 1   | T | A | C | A | C | G | A | A | C | G | A | T |
| +CGAA             | 2   | T | A | C | A | C | G | A | A | C | G | A | T |
| +GAAT             | 1   | T | A | C | A | C | G | A | A | T | G | A | T |
| +GGAAT            | 1   | T | A | C | A | C | G | A | A | T | G | G | A |
| -A                | 4   | T | A | C | A | C | G | A | - | T | G | G | C |
| -43 bp            | 1   | - | - | - | - | - | - | - | G | A | A | T | G |
| -56 bp            | 1   | - | - | - | - | - | - | - | A | A | T | G | C |
| -1175 bp          | 55  | T | A | C | A | - | - | - | - | - | - | - | - |
| -11,731 bp        | 17  | - | - | - | - | - | - | - | - | - | - | - | - |
| Maintain Cut Site | 31  | T | A | C | A | C | G | A | A | T | G | G | C |
| TOTAL sequenced   | 180 |   |   |   |   |   |   |   |   |   |   |   |   |

None  
AAT  
CCAAGCTACTACA  
TGGAAAAAAAAAAAA

| Mutation          | #  | T | A | C |  | A | C | G | A | A | T | G | G | C |
|-------------------|----|---|---|---|--|---|---|---|---|---|---|---|---|---|
| +AC               | 16 | T | A | C |  | A | C | G | A | A | T | G | G | C |
| -1175 bp          | 18 | T | A | C |  | A | - | - | - | - | - | - | - | - |
| -11,731 bp        | 6  | - | - | - |  | - | - | - | - | - | - | - | - | - |
| Maintain Cut Site | 55 | T | A | C |  | A | C | G | A | A | T | G | G | C |
| TOTAL sequenced   | 95 |   |   |   |  |   |   |   |   |   |   |   |   |   |

CCAAGCTACTACA  
TGGAAAAAAAAAAAA

**SJR5202 (-1,ACGAAT) mus81Δrad1Δ Survivors**

| Mutation          | #  | T | A | C |  | A |   |   |   | C | G | A | A | T | G | G | C |   |
|-------------------|----|---|---|---|--|---|---|---|---|---|---|---|---|---|---|---|---|---|
| +AC               | 24 | T | A | C |  | A |   |   |   | C | G | A | A | T | G | G | C |   |
| +CGAA             | 4  | T | A | C |  | A | C | G | A | A | C | G | A | A | T | G | G | C |
| 2A>3A             | 1  | T | A | C |  | A |   |   |   | C | G | A | A | A | T | G | G | C |
| -A                | 2  | T | A | C |  | A |   |   |   | C | G | A | - | T | G | G | C |   |
| -1175 bp          | 26 | T | A | C |  | A |   |   |   | - | - | - | - | - | - | - | - |   |
| -11,731 bp        | 7  | - | - | - |  | - |   |   |   | - | - | - | - | - | - | - | - |   |
| Maintain Cut Site | 22 | T | A | C |  | A |   |   |   | C | G | A | A | T | G | G | C |   |
| TOTAL sequenced   | 86 |   |   |   |  |   |   |   |   |   |   |   |   |   |   |   |   |   |

CCAAGCTACTACA  
TGGAAAAAAAAAAAA

**SJR5240 (-1,ACGAAT) slx4Δ Survivors**

| Mutation          | #  | T | A | C |  |  |  | A | C |   |   |   | G | A | A |   |   | T | G | G | C |   |   |
|-------------------|----|---|---|---|--|--|--|---|---|---|---|---|---|---|---|---|---|---|---|---|---|---|---|
| +AC               | 32 | T | A | C |  |  |  | A | C |   |   |   | G | A | A |   |   | T | G | G | C |   |   |
| +CGAA             | 1  | T | A | C |  |  |  | A | C |   |   |   | G | A | A | C | G | A | A | T | G | G | C |
| 2A>3A             | 2  | T | A | C |  |  |  | A | C |   |   |   | G | A | A | A |   | T | G | G | C |   |   |
| +GAATG            | 1  | T | A | C |  |  |  | A | C | G | A | A | T | G | G | A | A | T | G | G | C |   |   |
| +CGAAA            | 1  | T | A | C |  |  |  | C | G | A | A | A | A | C |   | G | A | A | T | G | G | C |   |
| -A                | 1  | T | A | C |  |  |  | A | C |   |   |   | G | A | - |   |   | T | G | G | C |   |   |
| -CTA              | 1  | - | - | C |  |  |  | A | C |   |   |   | G | A | A |   |   | T | G | G | C |   |   |
| -1175 bp          | 32 | T | A | C |  |  |  | A | - |   |   |   | - | - | - |   |   | - | - | - | - |   |   |
| -11,731 bp        | 0  | - | - | - |  |  |  | - | - |   |   |   | - | - | - |   |   | - | - | - | - |   |   |
| Maintain Cut Site | 18 | T | A | C |  |  |  | A | C |   |   |   | G | A | A |   |   | T | G | G | C |   |   |
| TOTAL sequenced   | 89 |   |   |   |  |  |  |   |   |   |   |   |   |   |   |   |   |   |   |   |   |   |   |

CCAAGCTACTACA  
TGGAAAAAAAAAAAA

**SJR5224 (-1,ACGTAT) Survivors**

**SJR5227 (-1,ACGTAT) mre11-D56N Survivors**

**SJR5225 (-1,ACGTAT) pol4Δ Survivors**

**SJR5226 (-1,ACGTAT) pol4Δ mre11-D56N Survivors**

**SJR5248 (-1,ACGTAT) pol4Δmre11Δ Survivors**

| Mutation          | #  | T | A | C | A | C | G | T | A | T | G | G | C |
|-------------------|----|---|---|---|---|---|---|---|---|---|---|---|---|
| -1175 bp          | 45 | T | A | C | A | - | - | - | - | - | - | - | - |
| -11,731 bp        | 0  | - | - | - | - | - | - | - | - | - | - | - | - |
| Maintain Cut Site | 43 | T | A | C | A | C | G | T | A | T | G | G | C |
| TOTAL sequenced   | 88 |   |   |   |   |   |   |   |   |   |   |   |   |

CCAAGCTACTACA  
TGGAAAAAAAAAAAA

**SJR5241 (-1,ACGTAT) pol4Δ pol3-DV Survivors**

| Mutation          | #  | T | A | C | A | C | G | T | A | T | G | G | C |
|-------------------|----|---|---|---|---|---|---|---|---|---|---|---|---|
| Complex Insertion | 1  | T | A | C | A | C | G | T | A | T | G | G | C |
| -1175 bp          | 11 | T | A | C | A | - | - | - | - | - | - | - | - |
| -11,731 bp        | 3  | - | - | - | - | - | - | - | - | - | - | - | - |
| Maintain Cut Site | 81 | T | A | C | A | C | G | T | A | T | G | G | C |
| TOTAL sequenced   | 96 |   |   |   |   |   |   |   |   |   |   |   |   |

CCAAGCTACTACA  
TGGAAAAAAAAAAAA
